# Supplementary material
Source: publisher site journal article supplement (https://www.spandidos-publications.com/7482/downloadSupplementary)
Supplement: Supplementary file 1 [file downloadSupplementary]

Table SI. Construct sequences used in the present study.

| Construct          | Sequences (5'-3')                     |
|--------------------|---------------------------------------|
| si-NC, forward     | UUCUCCGAACGUGUCACGUUU                 |
| si-NC, reverse     | ACGUGACAGGUUCGGAGAAUU                 |
| si-MTHFD1, forward | GCUGAAGAGAUUGGGAUCAA                  |
| si-MTHFD1, reverse | GCUUUGAUCCCAAUCUCUUA                  |
| OE MTHFD1, forward | AATGTACAAGGAATTCatggcgccagcagaaatcctg |
| OE MTHFD1, reverse | AATTATCTAGGGATCCtagaataatccattcacctg  |

Uppercase letters represent vector-derived sequences, while lowercase letters denote the MTHFD1 coding region. si, small interfering; NC, negative control; MTHFD1, methylenetetrahydrofolate dehydrogenase 1; OE, overexpression
